# Supplementary material for: Silk/agarose scaffolds with tunable properties via SDS assisted rapid gelation
Source: Royal Society of Chemistry journal article supplement (doi:10.1039/c7ra01981e), 2017-01-01
Supplement: c7ra01981e1.pdf [file c7ra01981e1.pdf]

## Supplementary Information

### Silk/Agarose Scaffolds with Tunable Properties via SDS

#### Assisted Rapid Gelation

Yue Lu,<sup>†</sup> Shupeng Zhang,<sup>†</sup> Xiangyang Liu,<sup>‡,§</sup> Shefang Ye,<sup>†</sup> Xi Zhou,<sup>†</sup> Qiaoling Huang<sup>\*,‡</sup>, and Lei Ren<sup>\*,†</sup>

<sup>†</sup>Department of Biomaterials and Fujian Collaborative Innovation Center for Exploitation and Utilization of Marine Biological Resources, College of Materials, Xiamen University, Xiamen 361005, China

<sup>‡</sup>Research Institute for Soft Matter and Biomimetics, Xiamen University, Xiamen 361005, China

<sup>§</sup>Department of Physics, FOS National University of Singapore, Singapore 117542, Singapore

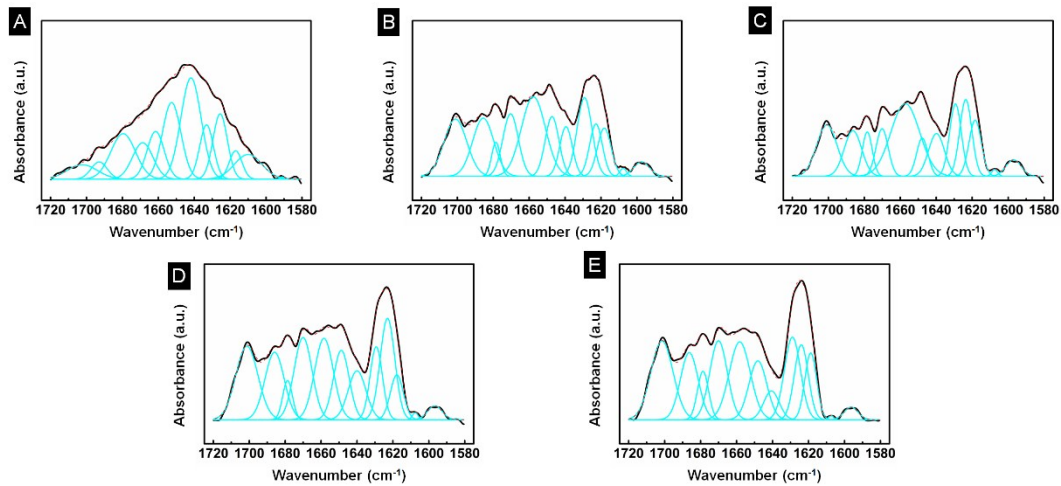

**Figure S1. Fourier self-deconvolution:** The FSD spectra of amide I region of SF/agarose scaffolds with different gelation degree (A-S1, B-S2, C-S3, D-S4, E-S5). The R2 in all the cases was > 0.99.

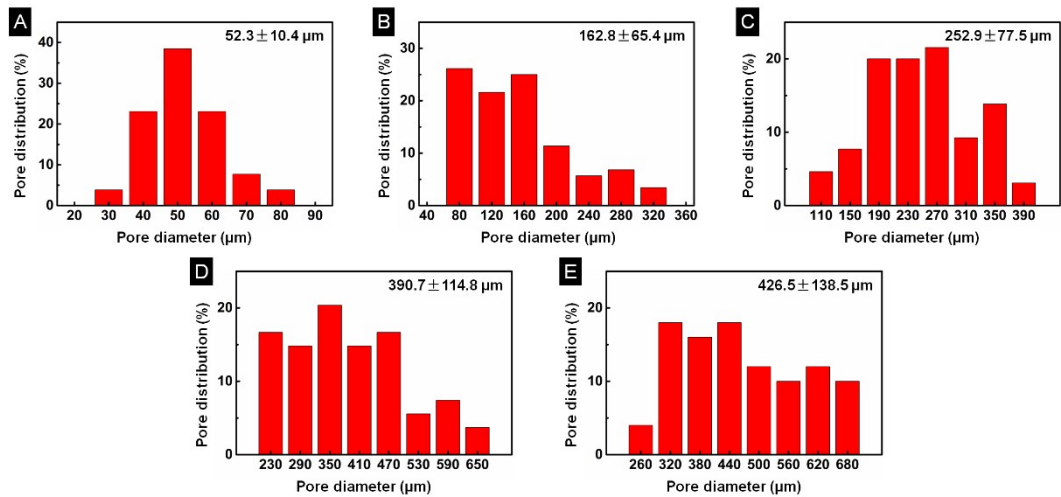

**Figure S2.** Pore size distribution of SF/agarose scaffolds with different gelation degree (A-S1, B-S2, C-S3, D-S4, E-S5).

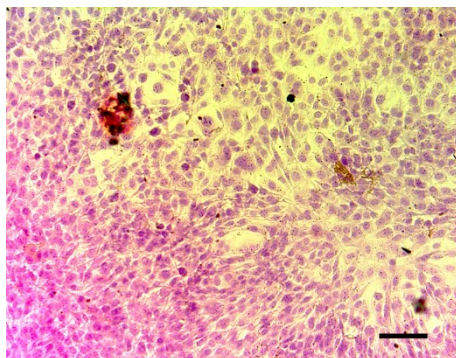

**Figure S3.** The microscopic images of MC3T3-E1 cells stained with Alizarin Red-S after 10 days culture on slides. Scale bar = 100  $\mu\text{m}$ .
